# Supplementary material
Source: PubMed Central journal article supplement (PMC6007015)
Supplement: NIHMS973399-supplement-SI.pdf [file NIHMS973399-supplement-SI.pdf]

## Mechanism of chloride inhibition of bilirubin oxidases and its dependence on potential and pH.

Anne de Poulpiquet,<sup>a</sup> Christian H. Kjaergaard,<sup>b</sup> Jad Rouhana,<sup>c,d</sup> Ievgen Mazurenko,<sup>a</sup> Pascale Infossi,<sup>a</sup> Sébastien Gounel,<sup>c,d</sup> Roger Gadiou,<sup>e</sup> Marie-Thérèse Giudici-Ortoni,<sup>a</sup> Edward I. Solomon\*,<sup>b</sup> Nicolas Mano\*,<sup>c,d</sup> and Elisabeth Lojou\*,<sup>a</sup>

<sup>a</sup>Aix Marseille Univ, CNRS, BIP, 31 chemin Aiguier, 13402 Marseille, France

<sup>b</sup> Department of Chemistry, Stanford University, Stanford, California 94305, United States

<sup>c</sup>CNRS, CRPP, UPR 8641, 33600 Pessac, France

<sup>d</sup>Univ. Bordeaux, CRPP, UPR 8641, 33600 Pessac, France

<sup>e</sup>Institut des Sciences de Matériaux de Mulhouse, CNRS, 15 rue Starcky, 68057 Mulhouse, France

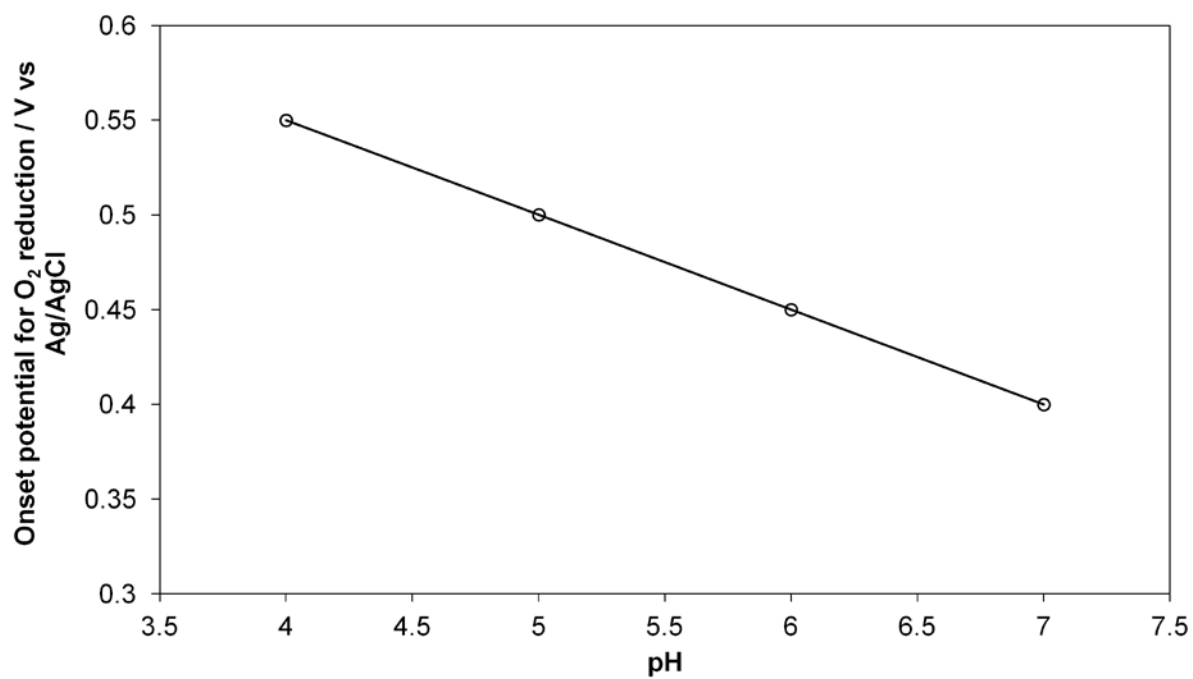

**Figure S11.** Dependence of onset for O<sub>2</sub> reduction on pH for *B. pumilus* BOD adsorbed at a CNF-modified pyrolytic graphite electrode in O<sub>2</sub> saturated 200-100 mM phosphate-citrate buffer at T = 50°C.

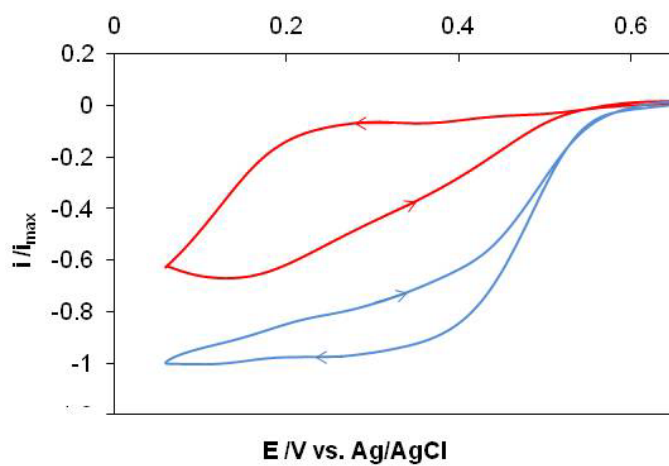

**Figure S12.** CV of *B. pumilus* BOD adsorbed at a bare pyrolytic graphite electrode before (blue curve) and after 15 mM NaCl addition (red curve) in O<sub>2</sub> saturated 200-100 mM phosphate-citrate buffer pH 4 at T = 50°C. Scan rate: 5 mV.s<sup>-1</sup>.

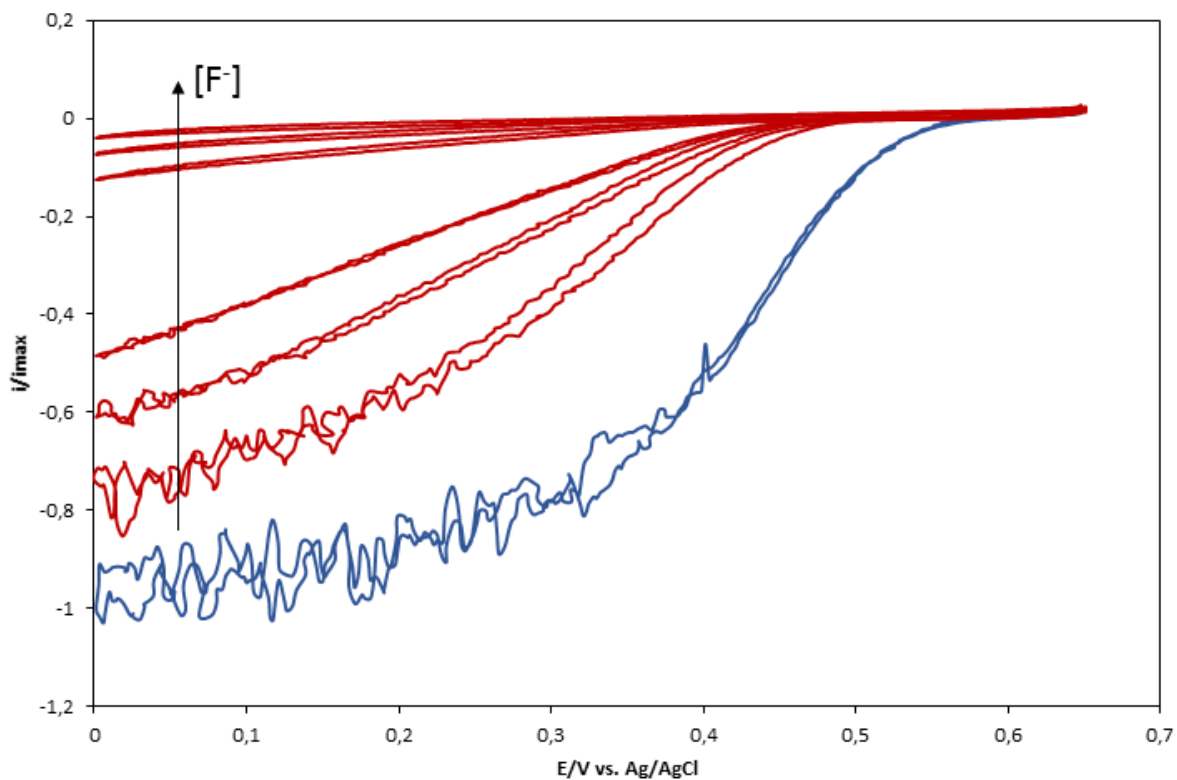

**Figure S13.** CVs of *B. pumilus* BOD adsorbed at a CNF-modified pyrolytic graphite electrode before (blue curve) and after NaF addition (red curves). The arrow shows the increase of NaF concentrations (respectively 10, 20, 30, 40, 50 and 80 mM). O<sub>2</sub> saturated 200-100 mM phosphate-citrate buffer pH 4 at T = 37°C. Scan rate: 5 mV.s<sup>-1</sup>.

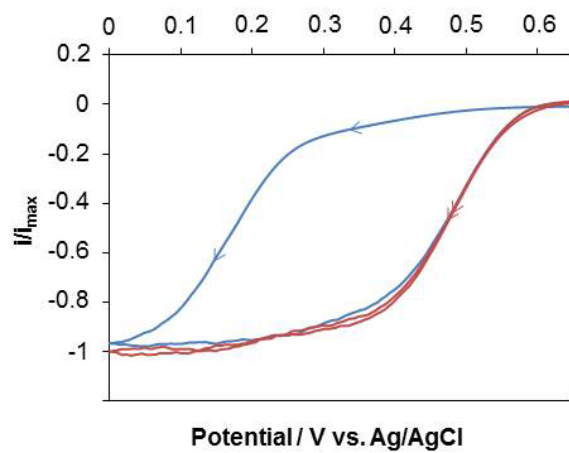

**Figure S14.** *B. pumilus* BOD reactivation after NaCl removal from the electrolyte. CV curves at  $5 \text{ mV}\cdot\text{s}^{-1}$  in  $\text{O}_2$  saturated 200-100 mM phosphate-citrate buffer pH 4 at  $T = 50^\circ\text{C}$ , first scan (blue curve) and second scan (red curve).

| Ligand-Buffer pH | Relative Enzyme Activity (%) |            |             |            |
|------------------|------------------------------|------------|-------------|------------|
|                  | [NaCl]                       | 0 mM       | 100 mM      | 200 mM     |
| ABTS - pH4       |                              | 100 ± 7.4  | 2.4 ± 2     | 0,6 ± 0.6  |
| ABTS - pH5       |                              | 100 ± 13.1 | 54.3 ± 24   | 28 ± 10.2  |
| ABTS - pH6       |                              | 100 ± 3.9  | 95.3 ± 8.2  | 87.8 ± 2.4 |
| ABTS - pH7       |                              | 100 ± 4.2  | 91.2 ± 13.5 | 87.5 ± 1   |
| SGZ - pH7        |                              | 100 ± 4.2  | 96 ± 3.3    | 92.3 ± 3.1 |

**Table S11.** Residual enzyme activity measured either with ABTS or SGZ by *B. pumilus* BOD after 10 minutes incubation in 100 or 200 mM NaCl as a function of pH. Phosphate-citrate buffer 200-100 mM, T = 37°C.

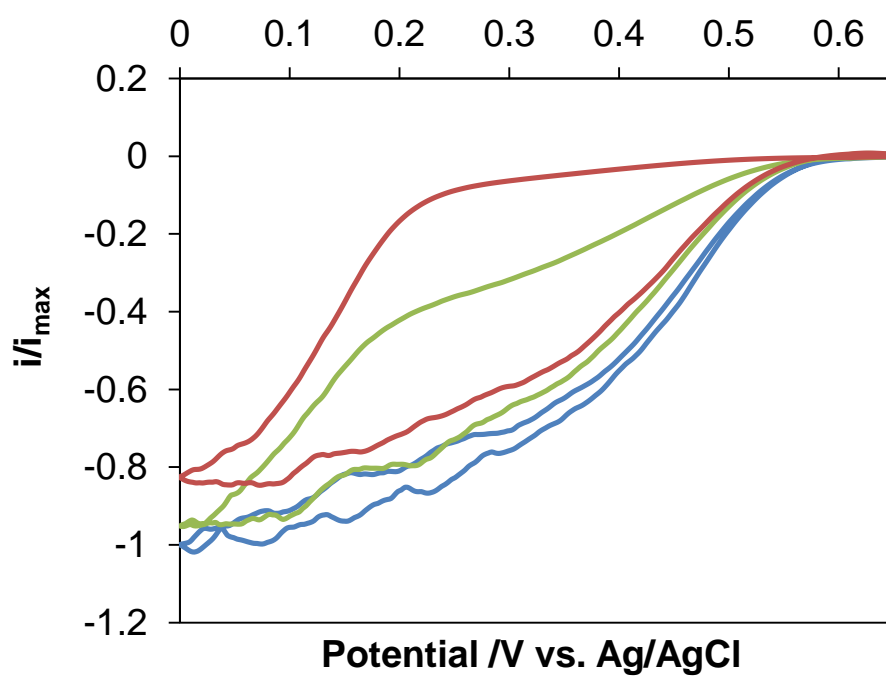

**Figure S15:**  $O_2$  reduction by *B. pumilus* BOD at pH 4 and 37°C: CV curves at 5  $mV \cdot s^{-1}$  in 200-100 mM phosphate-citrate buffer. Increasing incubation times in 5 mM NaCl: 0 min (blue curve); 15 min (green curve) and 30 min (red curve). Electrodes modified as in Fig 1.

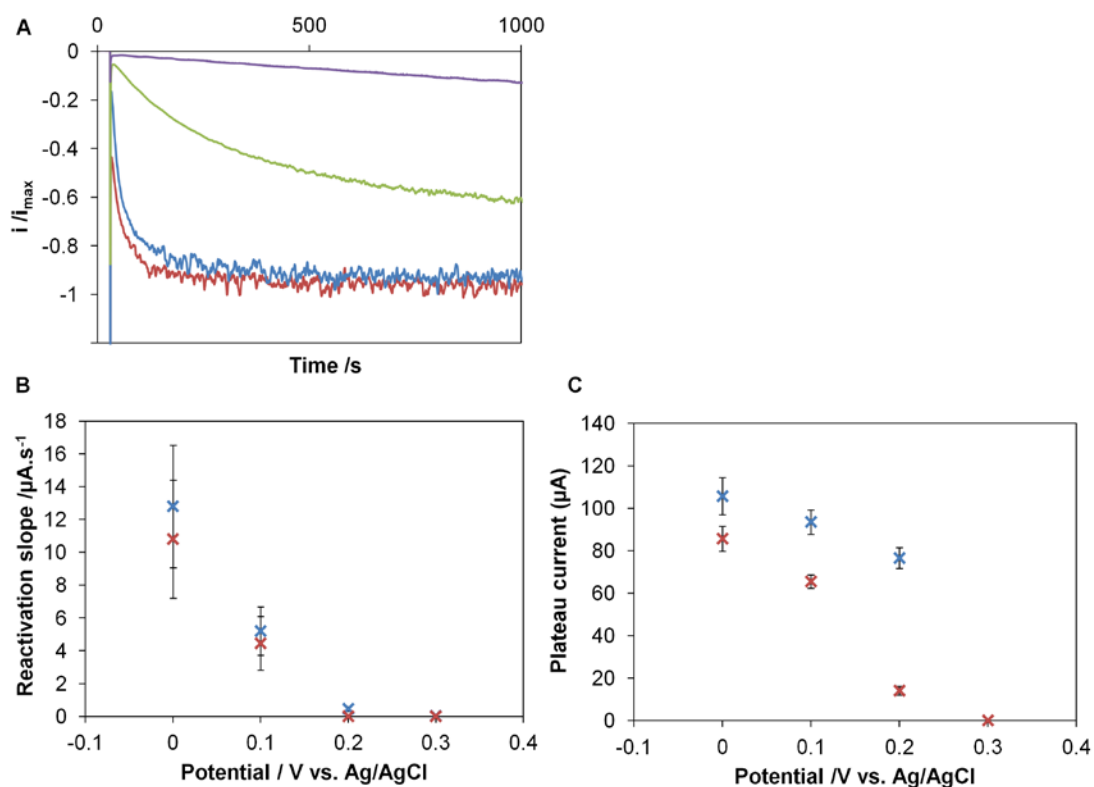

**Figure S16.** Influence of electrode potential on *B. pumilus* BOD reactivation. (A) Chronoamperometry experiments in the presence of 200 mM NaCl for  $E=0\text{V}$  (red curve) ;  $E=0.1\text{V}$  (blue curve) ;  $E=0.2\text{V}$  (green curve) and  $E=0.3\text{V}$  (purple curve). (B) reactivation slopes extracted from the chronoamperometry experiments in the presence of 200 mM NaCl in the electrolyte (red crosses) and after removal of NaCl from the electrolyte (blue crosses). (C) current plateau extracted from the chronoamperometry experiments in the presence of 200 mM NaCl in the electrolyte (red crosses) and after removal of NaCl from the electrolyte (blue crosses).  $\text{O}_2$ -saturated phosphate-citrate buffer 200-100 mM pH 4;  $T=25^\circ\text{C}$ .



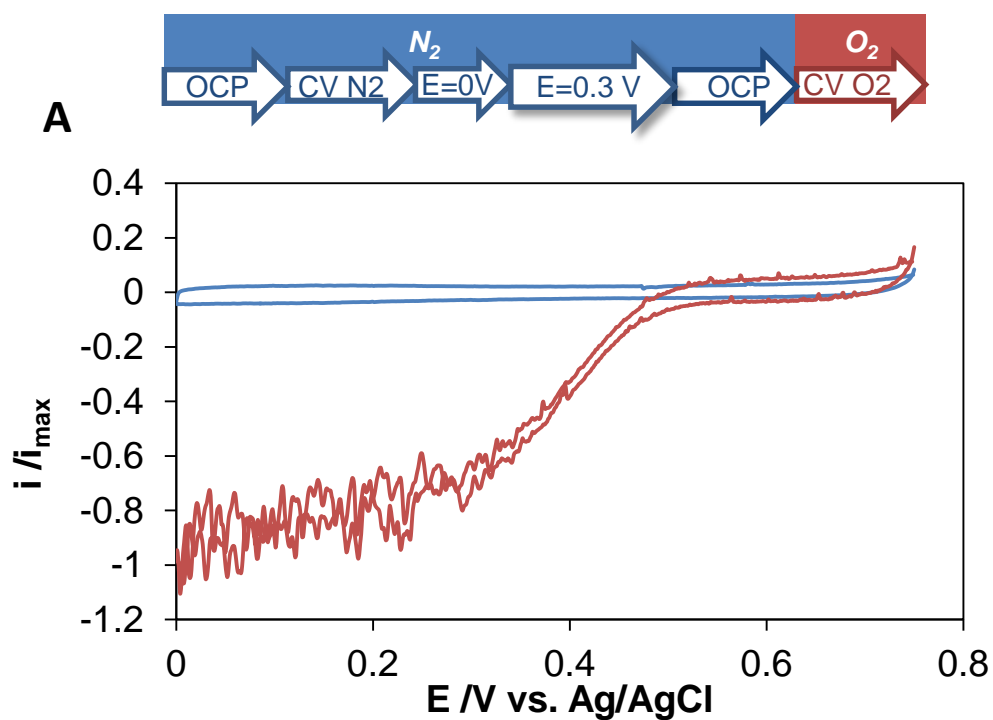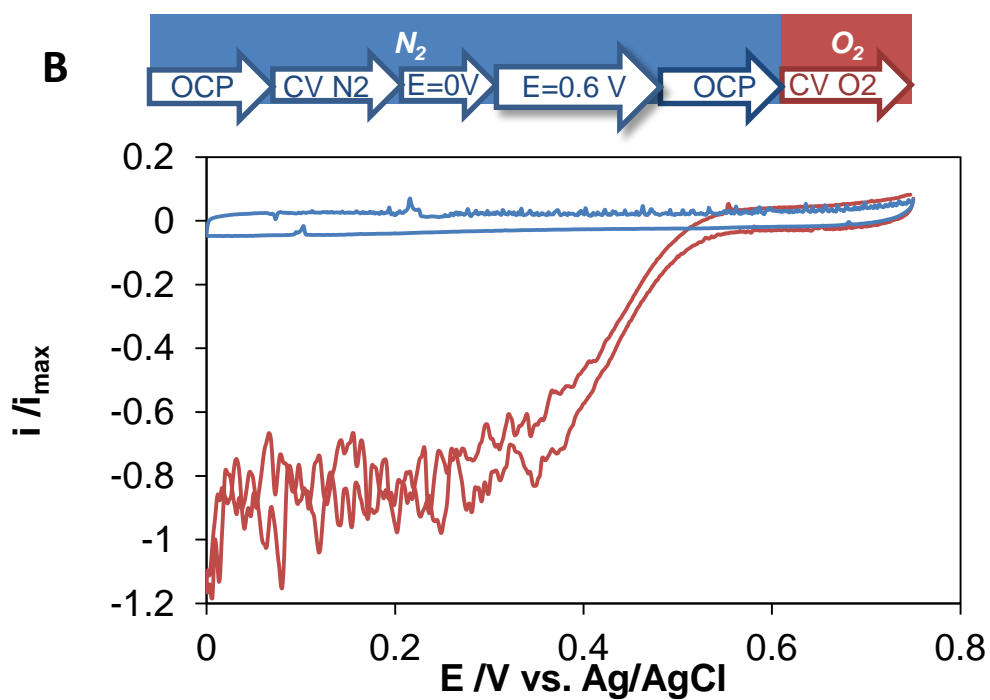

**Figure S17.** CV curve at 5  $\text{mV}\cdot\text{s}^{-1}$  under  $\text{O}_2$  after a reductive potential has been applied under  $\text{N}_2$ , followed by the application of an oxidative potential of +0.3V(A) for 10 minutes or +0.6 V (B) in the absence of NaCl under  $\text{N}_2$ .  $\text{O}_2$ -saturated Phosphate-citrate buffer, 200-100 mM pH 4,  $T = 37^\circ\text{C}$ , the pyrolytic graphite electrode was modified with carbon nanofibers.

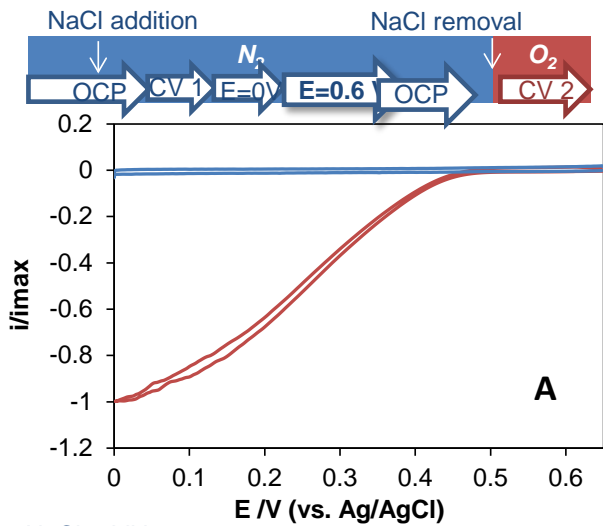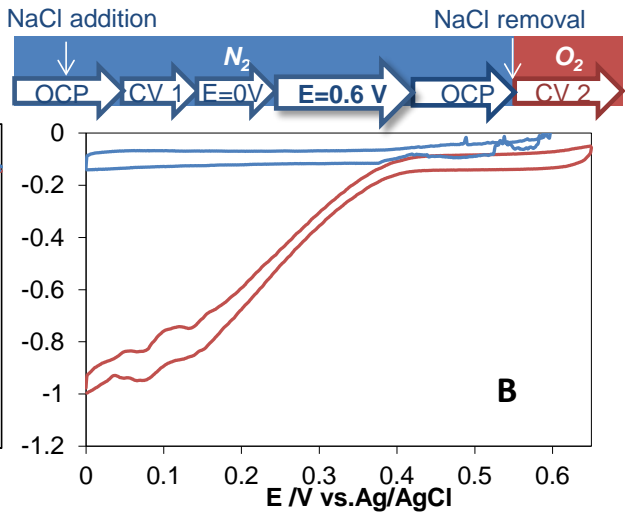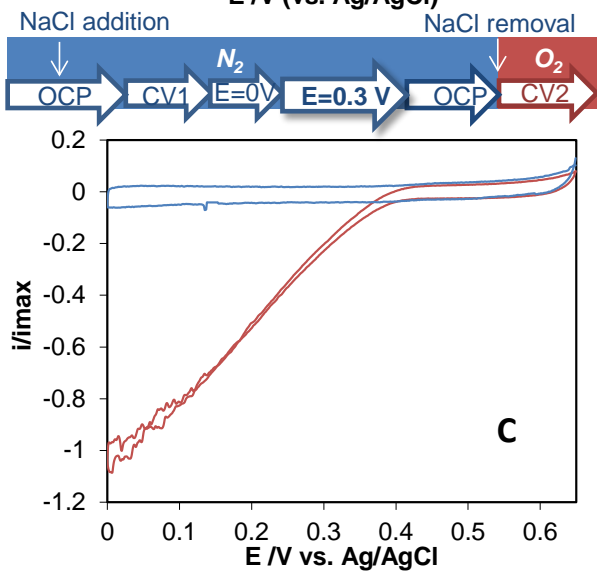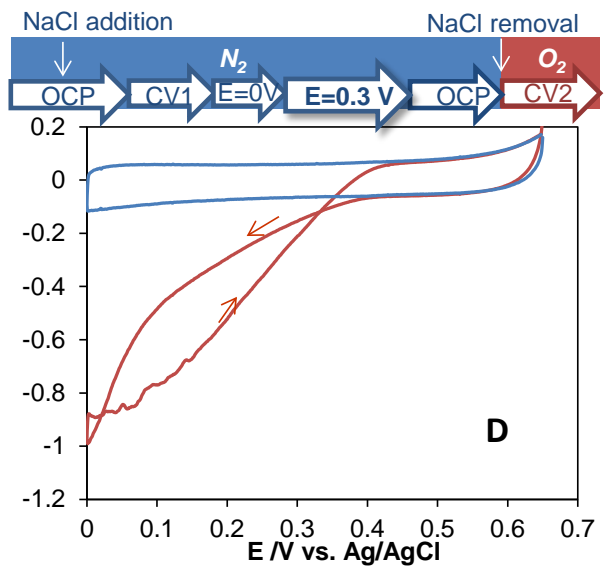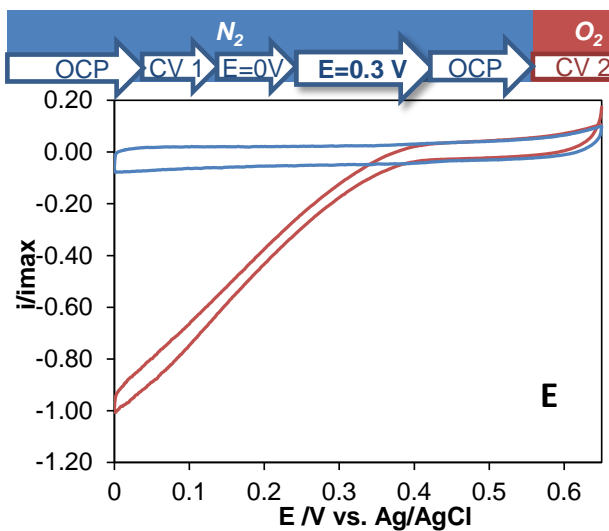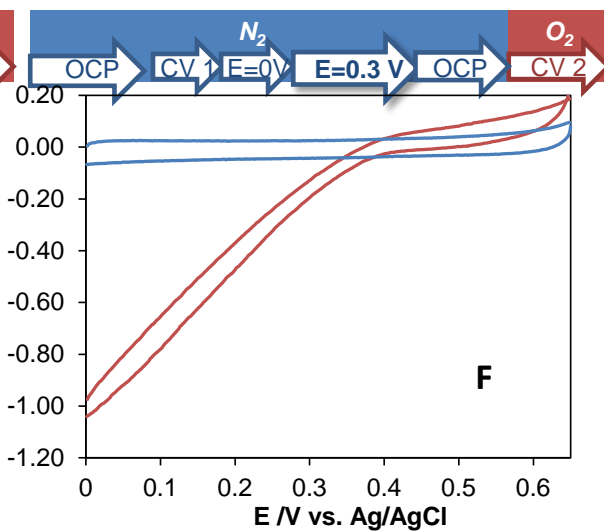

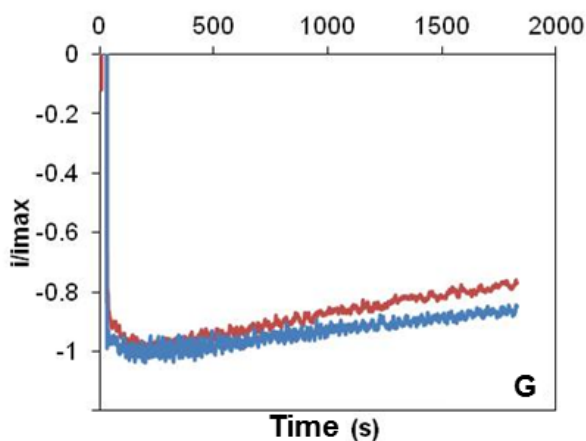

**Figure S18.** CV curves at  $5 \text{ mV}\cdot\text{s}^{-1}$  under  $\text{N}_2$  (blue curve) and under  $\text{O}_2$  (red curve) after an oxidative potential (+0.6V) has been applied for 30 mn (A) or 3 hours (B) in the presence of 200 mM NaCl under  $\text{N}_2$ .

C- D: same experiment but an oxidative potential of +0.3V has been applied for 30 mn (C) or 2 hours (D) in the presence of 200 mM NaCl under  $\text{N}_2$  conditions .

E-F: CV curves at  $5 \text{ mV}\cdot\text{s}^{-1}$  under  $\text{N}_2$  (blue curve) and under  $\text{O}_2$  (red curve) after + 0.3V has been applied in the absence of NaCl under  $\text{N}_2$  for 30 mn (E) or 2 hours (F). (G) Chronoamperometric measurement at  $E = +0.3 \text{ V vs Ag/AgCl}$  as a function of NaCl concentration. 50 mM (blue curve), 200 mM (red curve).  $\text{O}_2$ -saturated Phosphate-citrate buffer, 200-100 mM pH 7,  $T = 37 \text{ }^\circ\text{C}$ , the pyrolytic graphite electrode was modified with carbon nanofibers.
